# Supplementary material for: Effect of Extracellular Matrix Membrane on Bone Formation in a Rabbit Tibial Defect Model
Source: Hindawi journal article supplement (doi:10.1155/2016/6715295), 2016-01-01
Supplement: f1 [file 6715295.f1.pdf]

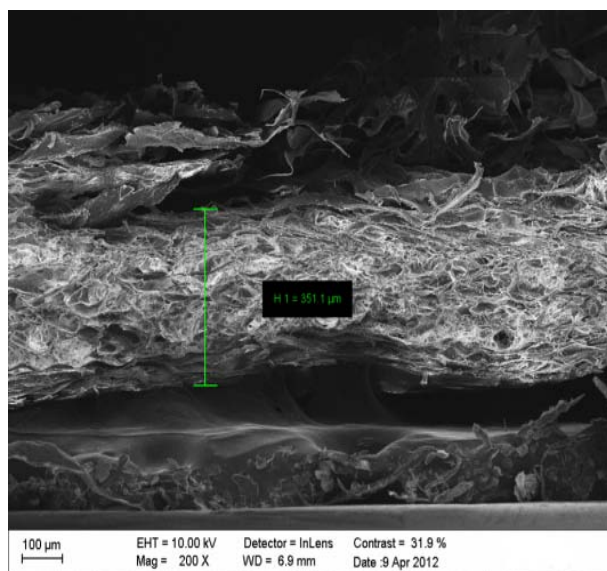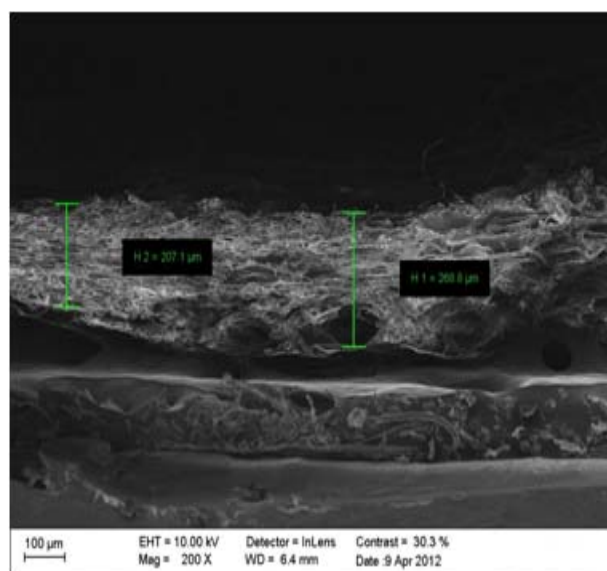

Supplementary Data 1. Thickness of APP, as visualized by SEM.

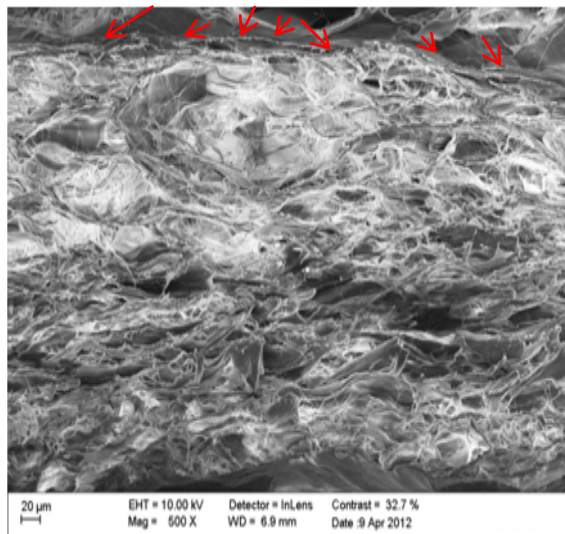

1 : smooth side(<0.01 mm)

2 : porous side

Supplementary Data 2. Morphology of APP, as visualized by SEM.

Supplementary Data 3. Tensile strength of commercial natural ECM membrane.

| Test Result                               |                                         |          |          |          |           |
|-------------------------------------------|-----------------------------------------|----------|----------|----------|-----------|
| Results                                   | Tensile strength                        |          | 6.37 MPa |          |           |
|                                           |                                         |          |          |          |           |
| Tensile Strength Test Result Summary      |                                         |          |          |          |           |
|                                           |                                         |          |          |          |           |
| 1. Test Result                            |                                         |          |          |          |           |
| Result                                    | Sample 1                                | Sample 2 | Sample 3 | Sample 4 | Sample 5  |
| 1.1. Cross-section area(mm <sup>2</sup> ) | 5.10                                    | 4.20     | 4.50     | 3.00     | 4.90      |
| 1.2. Maximum load(N)                      | 42.60                                   | 27.60    | 36.20    | 17.40    | 26.00     |
| 1.3. Maximum deformation amount(mm)       | 12.48                                   | 11.16    | 13.60    | 7.86     | 12.22     |
| 1.4. Maximum distortion(N/mm)             | 3.41                                    | 2.47     | 2.66     | 2.21     | 2.13      |
| 1.5. Tensile strength(MPa)                | 3.35                                    | 6.57     | 8.04     | 5.30     | 5.31      |
| Result                                    | Sample 6                                | Sample 7 | Sample 8 | Sample 9 | Sample 10 |
| 1.1. Cross-section area(mm <sup>2</sup> ) | 4.00                                    | 5.00     | 2.60     | 4.10     | 4.40      |
| 1.2. Maximum load(N)                      | 28.40                                   | 33.40    | 18.00    | 17.20    | 20.80     |
| 1.3. Maximum deformation amount(mm)       | 11.77                                   | 9.62     | 12.61    | 12.82    | 9.86      |
| 1.4. Maximum distortion(N/mm)             | 2.41                                    | 3.47     | 1.43     | 1.34     | 2.11      |
| 1.5. Tensile strength(MPa)                | 7.10                                    | 6.68     | 6.92     | 4.20     | 4.73      |
| 1.6. Average                              | 6.37 MPa (SD : 1.35 MPa, CV : 21.27 % ) |          |          |          |           |

## Supplementary Data 4. Tensile strength of APP.

| Test Result |                  |           |
|-------------|------------------|-----------|
| Results     | Tensile strength | 14.15 MPa |

### Tensile Strength Test Result Summary

#### 1. Test Result

| Result                                    | Sample 1                                 | Sample 2 | Sample 3 | Sample 4 | Sample 5  |
|-------------------------------------------|------------------------------------------|----------|----------|----------|-----------|
| 1.1. Cross-section area(mm <sup>2</sup> ) | 3.40                                     | 2.80     | 2.10     | 2.10     | 3.50      |
| 1.2. Maximum load(N)                      | 40.60                                    | 37.00    | 36.80    | 30.80    | 40.80     |
| 1.3. Maximum deformation amount(mm)       | 1.71                                     | 1.55     | 1.71     | 1.61     | 1.25      |
| 1.4. Maximum distortion(N/mm)             | 23.74                                    | 23.87    | 21.52    | 19.13    | 32.64     |
| 1.5. Tensile strength(MPa)                | 11.94                                    | 13.21    | 17.52    | 14.67    | 11.66     |
| Result                                    | Sample 6                                 | Sample 7 | Sample 8 | Sample 9 | Sample 10 |
| 1.1. Cross-section area(mm <sup>2</sup> ) | 3.30                                     | 2.70     | 2.10     | 2.20     | 2.50      |
| 1.2. Maximum load(N)                      | 48.20                                    | 30.20    | 31.40    | 31.20    | 44.00     |
| 1.3. Maximum deformation amount(mm)       | 1.33                                     | 1.11     | 1.14     | 1.14     | 1.67      |
| 1.4. Maximum distortion(N/mm)             | 36.24                                    | 27.21    | 27.54    | 27.37    | 26.35     |
| 1.5. Tensile strength(MPa)                | 14.61                                    | 11.19    | 14.95    | 14.18    | 17.60     |
| 1.6. Average                              | 14.15 MPa (SD : 2.23 MPa, CV : 15.32 % ) |          |          |          |           |
